# Supplementary material for: Neutrophil extracellular traps promote macrophage inflammation and impair atherosclerosis resolution in diabetic mice
Source: JCI journal article supplement (doi:10.1172/jci.insight.134796), 2020-03-19
Supplement: sd1 [file 1]

## Supplemental Data

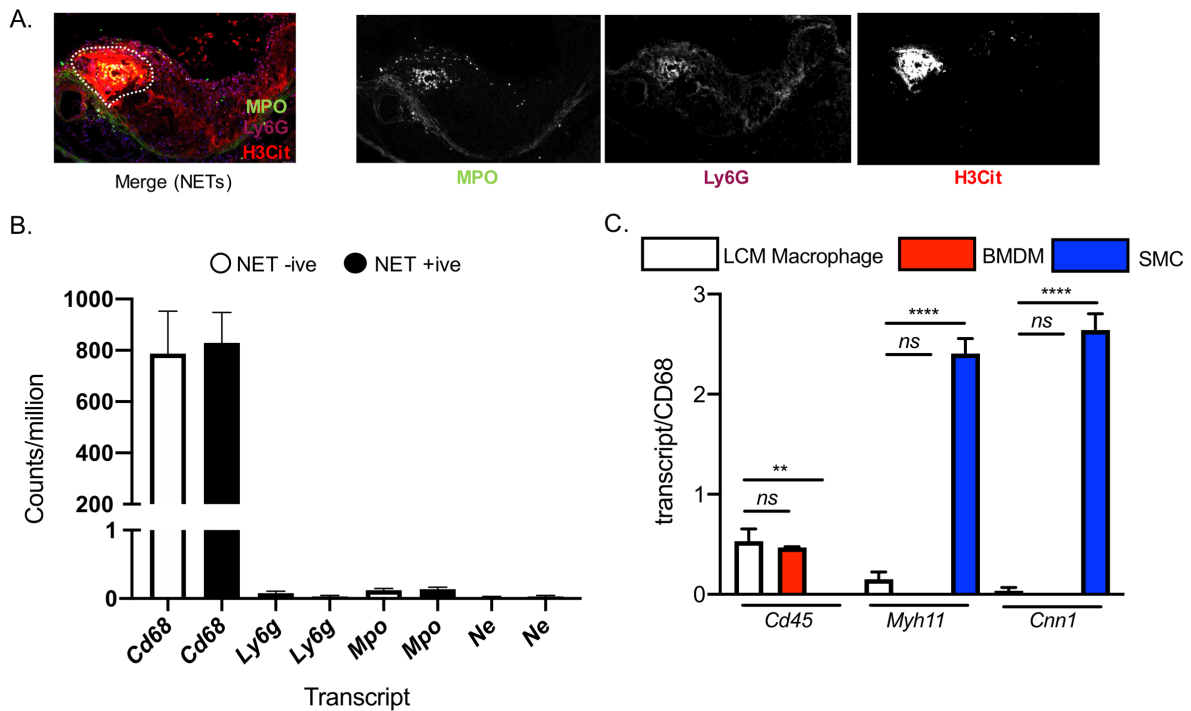

### Supplemental Figure 1

**(A)** Atherosclerotic plaque section stained for neutrophil extracellular traps (NETs) as determined by colocalization of MPO (left), Ly6G (middle), H3Cit (right). **(B)** Macrophage (*Cd68*) and neutrophil (*Ly6g*, *Mpo*, neutrophil elastase (*Ne*)) markers detected with RNA sequencing (counts/million). **(C)** Expression of macrophage (*Cd45*) and smooth muscle cell (Myosin Heavy Chain 11, *Myh11*; Calponin 1, *Cnn1*) transcripts in isolated LCM macrophages, murine bone marrow-derived macrophages (BMDM)s and murine vascular smooth muscle cells (SMC)s, as determined by RNAseq and represented as transcript/CD68 ratio. \*\*  $P < 0.005$ , \*\*\*\*  $P < 0.0001$  1-way ANOVA with Dunnett's multiple comparison test,  $n = 3$ /cell type.

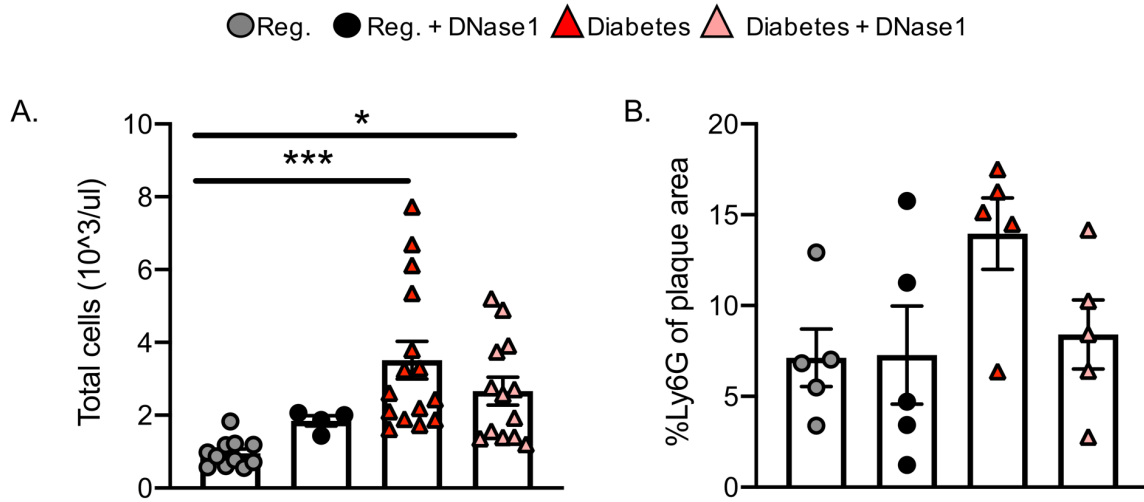

**Supplemental Figure 2**

**(A)** Circulating neutrophil counts and **(B)** plaque neutrophil contents. Data are shown as mean  $\pm$  SEM, N=4-15/group \*P<0.05, \*\*\* P<0.001 1-way ANOVA with Dunnett's multiple comparison test.
